# Supplementary material
Source: ML conference proceedings conference paper supplement (https://proceedings.neurips.cc/paper_files/paper/2017/hash/a2186aa7c086b46ad4e8bf81e2a3a19b-Abstract.html)
Supplement: Supplementary file [file a2186aa7c086b46ad4e8bf81e2a3a19b-Supplemental.zip]

## A Proofs

### A.1 Multi-scale FTPL algorithm

**Proof of Theorem 1.** Recall that  $B(i) = 5c_i \sqrt{n(\log(1/\pi_i) + \log(4c_i^2 n))}$ . Let  $\mathcal{C} = \{g \in \mathbb{R}^N \mid |g_i| \leq c_i \forall i \in [N]\}$ . For a regret bound of the form  $B(i) + K$  to be achievable by a randomized algorithm such as Algorithm 3 we need

$$\mathcal{V}_n \triangleq \left\langle \left\langle \inf_{P_t \in \Delta(\Delta_N)} \sup_{g_t \in \mathcal{C}} \mathbb{E}_{p_t \sim P_t} \mathbb{E}_{i_t \sim p_t} \right\rangle \right\rangle_{t=1}^n \sup_{i \in [N]} \left[ \sum_{t=1}^n \langle e_{i_t}, g_t \rangle - \sum_{t=1}^n \langle e_i, g_t \rangle - B(i) \right] \leq K,$$

where  $\langle \star \rangle_{t=1}^n$  denotes interleaving of the operator  $\star$  from  $t = 1$  to  $n$ . In the context of Algorithm 3, the distributions  $p_t$  above refer to the strategy  $p_t(\sigma_{t+1:n})$  selected by the algorithm and  $P_t$  refers to the distribution over this strategy induced by sampling the random variables  $\sigma_{t+1:n}$ . See [14] for a more extensive introduction to this type of minimax analysis for comparator-dependent regret bounds.

We will develop an algorithm to certify this bound for  $K = 1$  using the framework of adaptive relaxations proposed by [14]. Define a relaxation  $\mathbf{Rel} : \bigcup_{t=0}^n \mathcal{C}^t \rightarrow \mathbb{R}$  via

$$\mathbf{Rel}(g_{1:t}) \triangleq \mathbb{E}_{\sigma_{t+1:n} \in \{\pm 1\}^N} \sup_{i \in [N]} \left[ - \sum_{s=1}^t \langle e_i, g_s \rangle + 4 \sum_{s=t+1}^n \sigma_s[i] c_i - B(i) \right].$$

The proof structure is as follows: We show that playing  $p_t$  as suggested by Algorithm 3 with  $\mathbf{Rel}$  satisfies the initial condition and admissibility condition for adaptive relaxations from [14], which implies that if we play  $p_t$  we will have  $\mathbf{Reg}_n(i) \leq B(i) + \mathbf{Rel}(\cdot)$ . Then as a final step we bound  $\mathbf{Rel}(\cdot)$  using a probabilistic maximal inequality, Lemma 2.

**Initial condition** This condition asks that the initial value of the relaxation  $\mathbf{Rel}$  upper bound the worst-case value of the negative benchmark minus the bound  $B(i)$  (in other words, the inner part of  $\mathcal{V}_n$  with the learner's loss removed). This holds by definition and is trivial to verify:

$$\mathbf{Rel}(g_{1:n}) = \sup_{i \in [N]} \left[ - \sum_{t=1}^n \langle e_i, g_t \rangle - B(i) \right].$$

**Admissibility** For this step we must show that the inequality

$$\inf_{P_t \in \Delta(\Delta_N)} \sup_{g_t \in \mathcal{C}} \mathbb{E}_{p_t \sim P_t} \mathbb{E}_{i_t \sim p_t} [\langle e_{i_t}, g_t \rangle + \mathbf{Rel}(g_{1:t})] \leq \mathbf{Rel}(g_{1:t-1})$$

holds for each timestep  $t$ , and further that the inequality is certified by the strategy of Algorithm 3. We begin by expanding the definition of  $\mathbf{Rel}$ :

$$\begin{aligned} & \inf_{P_t \in \Delta(\Delta_N)} \sup_{g_t \in \mathcal{C}} \mathbb{E}_{p_t \sim P_t} \mathbb{E}_{i_t \sim p_t} [\langle e_{i_t}, g_t \rangle + \mathbf{Rel}(g_{1:t})] \\ &= \inf_{P_t \in \Delta(\Delta_N)} \sup_{g_t \in \mathcal{C}} \mathbb{E}_{p_t \sim P_t} \mathbb{E}_{i_t \sim p_t} \left[ \langle e_{i_t}, g_t \rangle + \mathbb{E}_{\sigma_{t+1:n} \in \{\pm 1\}^N} \sup_{i \in [N]} \left[ - \sum_{s=1}^t \langle e_i, g_s \rangle + 4 \sum_{s=t+1}^n \sigma_s[i] c_i - B(i) \right] \right]. \end{aligned}$$

Now plug in the randomized strategy given by Algorithm 3, with  $\mathbb{E}_{\sigma_{t+1:n} \in \{\pm 1\}^N}$  taking the place of  $\mathbb{E}_{p_t \sim P_t}$ :

$$\leq \sup_{g_t \in \mathcal{C}} \left[ \mathbb{E}_{\sigma_{t+1:n} \in \{\pm 1\}^N} \left[ \mathbb{E}_{i_t \sim p_t(\sigma_{t+1:n})} \langle e_{i_t}, g_t \rangle \right] + \mathbb{E}_{\sigma_{t+1:n} \in \{\pm 1\}^N} \sup_{i \in [N]} \left[ - \sum_{s=1}^t \langle e_i, g_s \rangle + 4 \sum_{s=t+1}^n \sigma_s[i] c_i - B(i) \right] \right].$$

Grouping expectations and applying Jensen's inequality:

$$\leq \mathbb{E}_{\sigma_{t+1:n} \in \{\pm 1\}^N} \sup_{g_t \in \mathcal{C}} \left[ \mathbb{E}_{i_t \sim p_t(\sigma_{t+1:n})} \langle e_{i_t}, g_t \rangle + \sup_{i \in [N]} \left[ - \sum_{s=1}^t \langle e_i, g_s \rangle + 4 \sum_{s=t+1}^n \sigma_s[i] c_i - B(i) \right] \right].$$

Expanding the definition of  $p_t$  (using its optimality in particular):

$$= \mathbb{E}_{\sigma_{t+1:n} \in \{\pm 1\}^N} \inf_{p_t \in \Delta_N} \sup_{g_t \in \mathcal{C}} \left[ \langle p_t, g_t \rangle + \sup_{i \in [N]} \left[ - \sum_{s=1}^t \langle e_i, g_s \rangle + 4 \sum_{s=t+1}^n \sigma_s[i] c_i - B(i) \right] \right].$$

Now apply a somewhat standard sequential symmetrization procedure. Begin by using the minimax theorem to swap the order of  $\inf_{p_t}$  and  $\sup_{g_t}$ . To do so, we allow the  $g_t$  player to randomize, and denote their distribution by  $Q_t \in \Delta(\mathcal{C})$ .

$$= \mathbb{E}_{\sigma_{t+1:n} \in \{\pm 1\}^N} \sup_{Q_t \in \Delta(\mathcal{C})} \inf_{p_t \in \Delta_N} \mathbb{E}_{g_t \sim Q_t} \left[ \langle p_t, g_t \rangle + \sup_{i \in [N]} \left[ - \sum_{s=1}^t \langle e_i, g_s \rangle + 4 \sum_{s=t+1}^n \sigma_s[i] c_i - B(i) \right] \right].$$

Since the supremum over  $i$  does not directly depend on  $p_t$ , we can rewrite this expression by introducing a (conditionally) IID copy of  $g_t$  which we will denote as  $g'_t$ :

$$= \mathbb{E}_{\sigma_{t+1:n} \in \{\pm 1\}^N} \sup_{Q_t \in \Delta(\mathcal{C})} \mathbb{E}_{g_t \sim Q_t} \left[ \sup_{i \in [N]} \left[ \inf_{p_t \in \Delta_N} \mathbb{E}_{g'_t \sim Q_t} [\langle p_t, g'_t \rangle] - \sum_{s=1}^t \langle e_i, g_s \rangle + 4 \sum_{s=t+1}^n \sigma_s[i] c_i - B(i) \right] \right].$$

Choosing  $p_t$  to match  $e_i$ :

$$\leq \mathbb{E}_{\sigma_{t+1:n} \in \{\pm 1\}^N} \sup_{Q_t \in \Delta(\mathcal{C})} \mathbb{E}_{g_t \sim Q_t} \sup_{i \in [N]} \left[ \mathbb{E}_{g'_t \sim Q_t} [\langle e_i, g'_t \rangle] - \langle e_i, g_t \rangle - \sum_{s=1}^{t-1} \langle e_i, g_s \rangle + 4 \sum_{s=t+1}^n \sigma_s[i] c_i - B(i) \right].$$

Applying Jensen's inequality:

$$\leq \mathbb{E}_{\sigma_{t+1:n} \in \{\pm 1\}^N} \sup_{Q_t \in \Delta(\mathcal{C})} \mathbb{E}_{g_t \sim Q_t} \sup_{i \in [N]} \left[ \langle e_i, g'_t \rangle - \langle e_i, g_t \rangle - \sum_{s=1}^{t-1} \langle e_i, g_s \rangle + 4 \sum_{s=t+1}^n \sigma_s[i] c_i - B(i) \right].$$

At this point we can introduce a new Rademacher random variable  $\epsilon_t$  without changing the distribution of  $g'_t - g_t$ , thereby not changing the value of the game:

$$\begin{aligned} &= \mathbb{E}_{\sigma_{t+1:n} \in \{\pm 1\}^N} \sup_{Q_t \in \Delta(\mathcal{C})} \mathbb{E}_{\epsilon_t \in \{\pm 1\}} \mathbb{E}_{g_t, g'_t \sim Q_t} \sup_{i \in [N]} \left[ \epsilon_t \langle e_i, g'_t - g_t \rangle - \sum_{s=1}^{t-1} \langle e_i, g_s \rangle + 4 \sum_{s=t+1}^n \sigma_s[i] c_i - B(i) \right] \\ &\leq \mathbb{E}_{\sigma_{t+1:n} \in \{\pm 1\}^N} \sup_{Q_t \in \Delta(\mathcal{C})} \mathbb{E}_{\epsilon_t \in \{\pm 1\}} \mathbb{E}_{g_t, g'_t \sim Q_t} \left\{ \sup_{i \in [N]} \left[ \epsilon_t \langle e_i, g'_t \rangle + \frac{1}{2} \left( - \sum_{s=1}^{t-1} \langle e_i, g_s \rangle + 4 \sum_{s=t+1}^n \sigma_s[i] c_i - B(i) \right) \right] \right. \\ &\quad \left. + \sup_{i \in [N]} \left[ \epsilon_t \langle e_i, -g_t \rangle + \frac{1}{2} \left( - \sum_{s=1}^{t-1} \langle e_i, g_s \rangle + 4 \sum_{s=t+1}^n \sigma_s[i] c_i - B(i) \right) \right] \right\} \\ &= \mathbb{E}_{\sigma_{t+1:n} \in \{\pm 1\}^N} \sup_{Q_t \in \Delta(\mathcal{C})} \mathbb{E}_{\epsilon_t \in \{\pm 1\}} \mathbb{E}_{g_t \sim Q_t} \sup_{i \in [N]} \left[ 2\epsilon_t \langle e_i, g_t \rangle - \sum_{s=1}^{t-1} \langle e_i, g_s \rangle + 4 \sum_{s=t+1}^n \sigma_s[i] c_i - B(i) \right] \end{aligned}$$

The above expression is now linear in  $Q_t$ , so it may be replaced with a pure strategy:

$$= \mathbb{E}_{\sigma_{t+1:n} \in \{\pm 1\}^N} \sup_{g_t \in \mathcal{C}} \mathbb{E}_{\epsilon_t \in \{\pm 1\}} \sup_{i \in [N]} \left[ 2\epsilon_t \langle e_i, g_t \rangle - \sum_{s=1}^{t-1} \langle e_i, g_s \rangle + 4 \sum_{s=t+1}^n \sigma_s[i] c_i - B(i) \right]$$

This expression is also convex in  $g_t$ , which means that the supremum will be obtained at a vertex of  $\mathcal{C}$ :

$$= \mathbb{E}_{\sigma_{t+1:n} \in \{\pm 1\}^N} \sup_{\sigma_t \in \{\pm 1\}^N} \mathbb{E}_{\epsilon_t \in \{\pm 1\}} \sup_{i \in [N]} \left[ 2\epsilon_t \sigma_t[i] c_i - \sum_{s=1}^{t-1} \langle e_i, g_s \rangle + 4 \sum_{s=t+1}^n \sigma_s[i] c_i - B(i) \right]$$

Now apply [Theorem 10](#) conditioned on  $\sigma_{t+1:n}$ , with  $w_i = - \sum_{s=1}^{t-1} \langle e_i, g_s \rangle + 4 \sum_{s=t+1}^n \sigma_s[i] c_i - B(i)$ .

$$\begin{aligned} &\leq \mathbb{E}_{\sigma_{t:n} \in \{\pm 1\}^N} \sup_{i \in [N]} \left[ - \sum_{s=1}^{t-1} \langle e_i, g_s \rangle + 4 \sum_{s=t}^n \sigma_s[i] c_i - B(i) \right] \\ &= \mathbf{Rel}(g_{1:t-1}). \end{aligned}$$

**Final value** The final value of the relaxation is

$$\mathbf{Rel}(\cdot) = 2 \mathbb{E}_{\sigma_{1:n} \in \{\pm 1\}^N} \sup_{i \in [N]} \left[ 2 \sum_{t=1}^n \sigma_t[i] c_i - 5c_i \sqrt{n(\log(1/\pi_i) + \log(4c_i^2 n))} \right] \leq 2 \sum_{i \in [N]} \frac{\pi_i}{4c_i^2 n} \leq 1.$$

To show the first inequality we have applied a maximal inequality, [Lemma 2](#), by recognizing that  $\mathbf{Rel}(\cdot)$  is a supremum of a random process. Namely, we can write  $\mathbf{Rel}(\cdot)$  in the form

$\mathbb{E} \sup_{i \in [N]} \{X_i - B(i)\}$  with  $X_i = 2 \sum_{t=1}^n \sigma_t[i] c_i$ . The standard mgf bound of  $\mathbb{E} e^{\lambda X} \leq e^{\lambda^2 (b-a)^2/8}$  for mean-zero random variables  $X$  with  $a \leq X \leq b$  [6], along with independence of the Rademacher random variables in  $X_i$ , implies that  $X_i$  enjoys an mgf bound of

$$\mathbb{E} e^{\lambda X_i} \leq e^{2c_i^2 \lambda^2 n}.$$

So to prove the result it suffices to take  $h_i = 4c_i^2 n$  and  $p = 2$  in the statement of Lemma 2 and note that  $B(i) \geq (2 + 1/p) h_i^{1/p} (\log(h_i) + \log(1/\pi_i))^{1-1/p}$  in the notation of the lemma. The only additional detail to verify is that, since it was assumed that  $c_i \geq 1$  for all  $i$  and since  $n \geq 1$  by definition, the condition  $h_i/\pi_i \geq e$  required by Lemma 2 is satisfied.

**Computational efficiency** We briefly sketch how the min-max optimization problem in the learner's strategy can be computed efficiently. Recall that the optimization problem is

$$\begin{aligned} & \min_{p \in \Delta_N} \sup_{g_t: |g_t[i]| \leq c_i} \left[ \langle p, g_t \rangle + \sup_{i \in [N]} \left[ - \sum_{s=1}^t \langle e_i, g_s \rangle + 4 \sum_{s=t+1}^n \sigma_s[i] c_i - B(i) \right] \right] \\ &= \min_{p \in \Delta_N} \sup_{i \in [N]} \sup_{g_t: |g_t[i]| \leq c_i} \left[ \langle p, g_t \rangle - \sum_{s=1}^t \langle e_i, g_s \rangle + 4 \sum_{s=t+1}^n \sigma_s[i] c_i - B(i) \right] \end{aligned}$$

Let  $G_{t-1}(i) = \sum_{s=1}^{t-1} g_s[i]$ . Since the quantity in the brackets above is linear in  $g_t$  and there are no interactions between coordinates, we can verify that conditioned on  $i$  the max over  $g_t$  is obtained via

$$\begin{aligned} &= \min_{p \in \Delta_N} \sup_{i \in [N]} \left[ \langle p, c \rangle + (1 - 2p[i]) c_i - G_{t-1}(i) + 4 \sum_{s=t+1}^n \sigma_s[i] c_i - B(i) \right] \\ &= \min_{p \in \Delta_N} \sup_{i \in [N]} [\langle p, c \rangle + \langle a, e_i \rangle - 2\langle p, \text{diag}(c) e_i \rangle], \end{aligned}$$

where  $a[i] = c_i - G_{t-1}(i) + 4 \sum_{s=t+1}^n \sigma_s[i] c_i - B(i)$ . We can now employ a standard reduction from saddle point optimization to linear programming, i.e.

$$\begin{aligned} & \text{minimize} && \langle p, c \rangle + s \\ & \text{subject to} && s \geq \langle a, e_i \rangle - 2\langle p, \text{diag}(c) e_i \rangle \quad \forall i. \\ & && p \in \Delta_N. \end{aligned}$$

Assuming that  $\min_i c_i \geq 1$ , this linear program can be solved to accuracy  $\epsilon$  by interior point methods (e.g. [35]) in time  $O(N^{3.5} \log(\epsilon^{-1} \max_i c_i))$  or by Mirror-Prox [28] in time  $O(N \epsilon^{-1} \max_i c_i)$ . Since our rates scale as  $\sqrt{n}$  we can set  $\epsilon = 1/(\sqrt{n} \max_i c_i)$  to conclude the result.

As a final implementation detail, we remark that similar to the FTPL algorithm in [34] one can draw each perturbation  $\sigma_t[i]$ , from the distribution  $\mathcal{N}(0, 1)$  instead of using Rademacher random variables. This allows one to replace each sum  $\sum_{s=t}^n \sigma_s[i]$  with a draw from  $\mathcal{N}(0, n-t)$  and therefore avoid spending  $O(n)$  time per step sampling perturbations. We have omitted the details because — for most values of  $c$  and  $N$  used in our applications, at least — the time required to solve the saddle point optimization problem dominates the runtime, not the time to sample perturbations.  $\square$

**Theorem 10.** For any  $w \in \mathbb{R}^N$ , any  $c \in \mathbb{R}_+^N$ ,

$$\sup_{\sigma \in \{\pm 1\}^N} \mathbb{E} \max_{i \in [N]} \{w_i + 2\epsilon \sigma_i c_i\} \leq \mathbb{E} \max_{\sigma' \in \{\pm 1\}^N} \max_{i \in [N]} \{w_i + 4\sigma'_i c_i\}. \quad (11)$$

**Proof of Theorem 10.** Fix any  $\sigma \in \{\pm 1\}^N$ . Let  $i_1 = \arg \max_{i \in [N]} \{w_i + 2\sigma_i c_i\}$  and  $i_{-1} = \arg \max_{i \in [N]} \{w_i - 2\sigma_i c_i\}$ . Then it is easy to see that

$$\mathbb{E} \max_{i \in [N]} \{w_i + 2\epsilon \sigma_i c_i\} = \mathbb{E} \max_{i \in \{i_1, i_{-1}\}} \{w_i + 2\epsilon \sigma_i c_i\} \leq \mathbb{E} \max_{\sigma' \in \{\pm 1\}^N} \max_{i \in \{i_1, i_{-1}\}} \{w_i + 4\sigma'_i c_i\} \leq \mathbb{E} \max_{\sigma' \in \{\pm 1\}^N} \max_{i \in [N]} \{w_i + 4\sigma'_i c_i\}.$$

The central inequality above follows by Lemma 1 with the pair  $(w, 2c)$ . Since the above bound holds for any  $\sigma$ , we conclude that (11) holds.  $\square$

**Lemma 1.** For any pair  $(w, c)$  where  $w \in \mathbb{R}^N$  any  $c \in \mathbb{R}_+^N$ , the inequality

$$\sup_{\sigma \in \{\pm 1\}^N} \mathbb{E} \max_{\epsilon \in \{\pm 1\}} \{w_i + \epsilon \sigma_i c_i\} \leq \mathbb{E} \max_{\sigma \in \{\pm 1\}^N} \{w_i + 2\sigma_i c_i\}. \quad (12)$$

holds when  $N = 2$ .

**Proof of Lemma 1.** In this proof we adopt the notation that for any element  $j \in [2]$ ,  $-j$  denote the other element. Say the pair  $(w, c)$  is *dominated* if there exists  $j$  for which  $w_j - c_j \geq w_{-j} + c_{-j}$ . Note that this of course implies  $w_j + c_j \geq w_{-j} + c_{-j}$  as well, since  $c$  is non-negative.

**Dominated case** Suppose  $(w, c)$  is dominated by index  $j$ . Then (12) holds trivially for any  $K \in \mathbb{R}$  by

$$\sup_{\sigma \in \{\pm 1\}^N} \mathbb{E} \max_{i \in [N]} \{w_i + \epsilon \sigma_i c_i\} = w_j = \max_{i \in [N]} \{w_i + K \mathbb{E} \sigma_i c_i\} \leq \mathbb{E} \max_{\sigma \in \{\pm 1\}^N} \{w_i + K \sigma_i c_i\}.$$

We now focus on the trickier “not dominated” case.

**Rescaling doesn’t induce domination** We first observe that if  $(w, c)$  does is not dominated,  $(w, Bc)$  is not dominated either for any  $B \geq 1$ . Let  $j$  be the index for which  $w_j + c_j \geq w_{-j} + c_{-j}$  which implies  $w_j - c_j \leq w_{-j} + c_{-j}$  because  $(w, c)$  is not dominated. Observe that if  $(w, Bc)$  is dominated we either have  $w_j - Bc_j \geq w_{-j} + Bc_{-j}$  or  $w_{-j} - Bc_{-j} \geq w_j + Bc_j$ . The first case cannot hold because  $B \geq 1$  and we already know that  $(w, c)$  is not dominated. The second case in particular implies  $w_{-j} \geq w_j$ , so we must have had  $c_j \geq c_{-j}$  to begin with. But in that case we will still have  $w_j + Bc_j \geq w_{-j} + Bc_{-j}$  which contradicts the domination.

Note: It is good to keep in mind that while rescaling does not induce domination, it may not be the case in general that  $w_j + Bc_j \geq w_{-j} + Bc_{-j}$  even though  $w_j + c_j \geq w_{-j} + c_{-j}$ . That is, the “leader” may change after rescaling.

**LHS of (12) for  $(w, c)$  not dominated** When  $(w, c)$  is not dominated we have

$$\sup_{\sigma \in \{\pm 1\}^N} \mathbb{E} \max_{i \in [N]} \{w_i + \epsilon \sigma_i c_i\} = \frac{1}{2}(w_1 + c_1) + \frac{1}{2}(w_2 + c_2).$$

**RHS of (12) for  $(w, c)$  not dominated** We will consider the RHS of (12) for  $(w, c') \triangleq (w, Bc)$  for some  $B \geq 1$  to be decided. By the argument above, the pair  $(w, c')$  is also not dominated. For the remainder of the proof, 1 will denote the index for which  $w_1 + c'_1 \geq w_2 + c'_2$ . Because the pair is not dominated, the value the RHS takes can be classified into two cases based on the relationship between  $c'$  and  $w$ .

- Case 1:  $w_1 - c'_1 \leq w_2 - c'_2$ :

In this case there is equal probability that the process takes on value  $w_2 - c'_2$  or  $w_2 + c'_2$  conditioned on the event that  $\sigma_1 = -1$ , so we have the equality:

$$\mathbb{E} \max_{\sigma \in \{\pm 1\}^N} \{w_i + \sigma_i c'_i\} = \frac{1}{2}(w_1 + w_2) + \frac{1}{2}c'_1$$

Furthermore, Case 1 implies  $c'_1 \geq c'_2$ , which leads to an inequality:

$$\geq \frac{1}{2}(w_1 + w_2) + \frac{1}{4}(c'_1 + c'_2).$$

- Case 2:  $w_1 - c'_1 \geq w_2 - c'_2$ :

In this case, conditioned on the event that  $\sigma_1 = -1$ , there is equal probability that the process takes on value  $w_2 + c'_2$  or  $w_1 - c'_1$ , so the equality becomes:

$$\mathbb{E} \max_{\sigma \in \{\pm 1\}^N} \{w_i + \sigma_i c'_i\} = \frac{1}{2}(w_1 + c'_1) + \frac{1}{4}(w_2 + c'_2) + \frac{1}{4}(w_1 - c'_1)$$

Case 2 implies that  $w_1 \geq w_2$ , because we may add the inequalities  $w_1 + c'_1 \geq w_2 + c'_2$  and  $w_1 - c'_1 \geq w_2 - c'_2$ . This gives an inequality:

$$\geq \frac{1}{2}(w_1 + w_2) + \frac{1}{4}(c'_1 + c'_2).$$

Combining our results for the two cases, we have that for any vector  $c'$ , so long as  $(w, c')$  is not dominated,

$$\mathbb{E}_{\sigma \in \{\pm 1\}^N} \max_{i \in [N]} \{w_i + \sigma_i c'_i\} \geq \frac{1}{2}(w_1 + w_2) + \frac{1}{4}(c'_1 + c'_2).$$

In particular, choosing  $B = 2$  implies (12) in the non-dominated case:

$$\begin{aligned} \mathbb{E}_{\sigma \in \{\pm 1\}^N} \max_{i \in [N]} \{w_i + 2\sigma_i c_i\} &\geq \frac{1}{2}(w_1 + w_2) + \frac{1}{2}(c_1 + c_2) \\ &= \sup_{\sigma \in \{\pm 1\}^N} \mathbb{E}_{\epsilon \in [N]} \max_{i \in [N]} \{w_i + \epsilon \sigma_i c_i\}. \end{aligned}$$

**Final result** Combining the dominated and non-dominated results we have that for any  $(w, c)$ .

$$\sup_{\sigma \in \{\pm 1\}^N} \mathbb{E}_{\epsilon \in [N]} \max_{i \in [N]} \{w_i + \epsilon \sigma_i c_i\} \leq \mathbb{E}_{\sigma \in \{\pm 1\}^N} \max_{i \in [N]} \{w_i + 2\sigma_i c_i\}.$$

□

**Lemma 2** (Multi-scale maximal inequality). Let  $(X_i)_{i \in [N]}$  be a real-valued random process for which there exists a sequence  $(h_i)_{i \in [N]}$  with  $h_i > 0$  such that the moment generating function bound  $\mathbb{E} e^{\lambda X_i} \leq e^{\lambda^p h_i}$  is satisfied for all  $\lambda > 0$  and some choice of  $p > 0$ . Then for any distribution  $\pi \in \Delta_N$  for which  $h_i/\pi_i \geq e$  for all  $i \in [N]$  it holds that

$$\mathbb{E} \sup_{i \in [N]} \left\{ X_i - (2 + 1/p) h_i^{1/p} (\log(h_i) + \log(1/\pi_i))^{1-1/p} \right\} \leq \sum_{i \in [N]} \frac{\pi_i}{h_i}. \quad (13)$$

**Proof.** Let  $B(i) = C h_i^{1/p} (\log(h_i) + \log(1/\pi_i))^{1-1/p}$  for some constant  $C$  to be decided later. One should verify that  $\log(h_i) + \log(1/\pi_i)$  is always non-negative by the assumption that  $h_i/\pi_i \geq e$ , which will be used repeatedly. To begin, observe that

$$\mathbb{E} \sup_{i \in [N]} \{X_i - B(i)\} \leq \mathbb{E} \sup_{i \in [N]} [X_i - B(i)]_+,$$

where  $[x]_+ = \max\{x, 0\}$ . By non-negativity of  $[x]_+$  it further holds that

$$\leq \mathbb{E} \sum_{i \in [N]} [X_i - B(i)]_+.$$

Fixing an arbitrary sequence  $(\lambda_i)_{i \in [N]}$  with  $\lambda_i > 0$ , the basic inequality  $\max\{a, b\} \leq \frac{1}{\lambda} \log(e^{\lambda a} + e^{\lambda b})$  implies the following upper bound:

$$\leq \mathbb{E} \sum_{i \in [N]} \frac{1}{\lambda_i} \log(1 + e^{\lambda_i (X_i - B(i))}).$$

Apply Jensen's inequality:

$$\leq \sum_{i \in [N]} \frac{1}{\lambda_i} \log(1 + \mathbb{E} e^{\lambda_i (X_i - B(i))}).$$

Now use the moment bound assumed in the lemma statement:

$$\leq \sum_{i \in [N]} \frac{1}{\lambda_i} \log(1 + e^{(\lambda_i^p h_i - \lambda_i B(i))}).$$

Lastly, apply the inequality  $\log(1 + x) \leq x$  for  $x \geq 0$ :

$$\leq \sum_{i \in [N]} \exp(\lambda_i^p h_i - \lambda_i B(i) + \log(1/\lambda_i)).$$

We now take  $\lambda_i = \left( \frac{\log(h_i) + \log(1/\pi_i)}{h_i} \right)^{1/p}$  and bound each exponent in the sum above. Using the definition of  $B(i)$ :

$$\lambda_i^p h_i - \lambda_i B(i) + \log(1/\lambda_i) = \log(1/\lambda_i) - (C - 1)(\log(1/\pi_i) + \log(h_i)).$$

Next observe that

$$\log(1/\lambda_i) = \frac{1}{p} \log\left(\frac{h_i}{\log(h_i/\pi_i)}\right) \leq \frac{1}{p} \log(h_i),$$

where we have used that  $h_i/\pi_i \geq e$ . With this, and using that  $\log(1/\pi_i) \geq 0$ , we have

$$\lambda_i^p h_i - \lambda_i B(i) + \log(1/\lambda_i) \leq -(C - 1 - 1/p)(\log(1/\pi_i) + \log(h_i)).$$

Taking  $C \geq 2 + 1/p$  and using this bound in the summation over  $i$  yields the result:

$$\mathbb{E} \sup_{i \in [N]} \{X_i - B(i)\} \leq \sum_{i \in [N]} \frac{\pi_i}{h_i}.$$

□

## A.2 Proofs for Section 2.2

**Proof of Theorem 2.** First, we verify that the loss sequence  $(g_t)_{t \leq n}$  is such that the regret bound derived for MULTISCALEFTPL applies. In particular, we need to verify that  $|g_t[i]| \leq c_i$  for each  $i$ . To this end, fix an index  $i \in [N]$ , and note that since  $f_t$  is  $L_i$ -Lipschitz on  $\mathcal{W}_i$  with respect to the norm  $\|\cdot\|_{(i)}$  we have

$$|g_t[i]| = |f_t(w_t^i) - f_t(0)| \leq L_i \|w_t^i - 0\|_{(i)} \leq L_i R_i \leq L_i R_i = c_i,$$

as required. Also, it was assumed that  $c_i = L_i R_i \geq 1$ , as required for Theorem 1.

Now, recall that  $(p_t)$  is the sequence of distributions produced by the meta-algorithm. The algorithm's total loss with respect to the centered iterates  $(\tilde{f}_t)$  is given by

$$\sum_{t=1}^n \tilde{f}_t(w_t^{i_t}) = \sum_{t=1}^n \langle e_{i_t}, g_t \rangle,$$

where this equality is due to the construction of the losses  $(g_t)_{t \leq n}$  given to MULTISCALEFTPL. The regret bound for MULTISCALEFTPL now implies that

$$\mathbb{E} \left[ \sum_{t=1}^n \langle e_{i_t}, g_t \rangle - \min_{i \in [N]} \left\{ \sum_{t=1}^n g_t[i] + O\left(R_i L_i \sqrt{n \log(R_i L_i n / \pi_i)}\right) \right\} \right] \leq 0,$$

where we have obtained this inequality by substituting the value of the vector  $c$  constructed by MULTISCALEOCO into the regret bound (4) for MULTISCALEFTPL. Now, observe that for each  $i$  we have

$$\sum_{t=1}^n g_t[i] = \sum_{t=1}^n \tilde{f}_t(w_t^i) \leq \inf_{w \in \mathcal{W}_i} \sum_{t=1}^n \tilde{f}_t(w) + \mathbf{Reg}_n(i),$$

where we have used the definition of  $g_t$  and the regret bound assumed on the sub-algorithm. Combining these inequalities, we have

$$\mathbb{E} \left[ \sum_{t=1}^n \tilde{f}_t(w_t^{i_t}) - \min_{i \in [N]} \left\{ \inf_{w \in \mathcal{W}_i} \sum_{t=1}^n \tilde{f}_t(w) + \mathbf{Reg}_n(i) + O\left(R_i L_i \sqrt{n \log(R_i L_i n / \pi_i)}\right) \right\} \right] \leq 0.$$

Finally, observe that since  $\tilde{f}_t(w) = f_t(w) - f_t(0)$ , the above is equivalent to

$$\mathbb{E} \left[ \sum_{t=1}^n f_t(w_t^{i_t}) - \min_{i \in [N]} \left\{ \inf_{w \in \mathcal{W}_i} \sum_{t=1}^n f_t(w) + \mathbf{Reg}_n(i) + O\left(R_i L_i \sqrt{n \log(R_i L_i n / \pi_i)}\right) \right\} \right] \leq 0.$$

□

**Mirror Descent** Online Mirror Descent is the standard algorithm for online linear optimization over convex sets. It is parameterized by a convex set  $\mathcal{W}$ , learning rate  $\eta$ , and strongly convex regularizer  $\mathcal{R} : \mathcal{W} \rightarrow \mathbb{R}$ . We define the update  $\text{MIRRODESCENT}(\eta, \mathcal{W}, \mathcal{R})$  as follows. First, set  $w_1 = \arg \min_{w \in \mathcal{W}} \mathcal{R}(w)$ . Then, for each time  $t \in [n]$ :

- Receive gradient  $g_t$  and let  $\tilde{w}_{t+1}$  satisfy  $\nabla \mathcal{R}(\tilde{w}_{t+1}) = \nabla \mathcal{R}(w_t) - \eta g_t$ .
- Set  $w_{t+1} = \arg \min_{w \in \mathcal{W}} \mathcal{D}_{\mathcal{R}}(w \mid \tilde{w}_{t+1})$ .

**Fact 1** (Mirror Descent (e.g. [15])). Let  $(w_t)$  be the iterates produced by  $\text{MIRRODESCENT}(\eta, \mathcal{W}, \mathcal{R})$  on a sequence of vectors  $(g_t)_{t \leq n}$ . If  $\mathcal{R}$  is  $\lambda$ -strongly convex with respect to a norm  $\|\cdot\|_{\mathcal{R}}$ , the iterates satisfy

$$\sum_{t=1}^n \langle w_t - w, g_t \rangle \leq \frac{\eta}{2\lambda} \sum_{t=1}^n \|g_t\|_{\mathcal{R},*}^2 + \frac{1}{\eta} \mathcal{R}(w) \quad \forall w \in \mathcal{W}. \quad (14)$$

**Proof of Theorem 3.** Recall that each sub-algorithm  $\text{ALG}_i$  runs Mirror Descent over a ball in  $(\mathfrak{B}, \|\cdot\|)$  of radius  $R_i$  using the regularizer  $\mathcal{R}(w) = \frac{1}{2}\|w\|^2$ . From the regret bound for Mirror Descent (Fact 1), the meta-algorithm's choice of Mirror Descent parameters for  $\text{ALG}_i$  (in particular, the choice  $\eta_i = \frac{R_i}{L} \sqrt{\frac{\lambda}{n}}$ ) guarantees that

$$\sum_{t=1}^n f_t(w_t^i) - \inf_{w \in \mathcal{W}_i} \sum_{t=1}^n f_t(w) \leq O(R_i L \sqrt{n/\lambda}).$$

Combined with the regret bound for  $\text{MULTISCALEOCO}$  (Theorem 2, noting that  $R_i L_i = R_i L \geq 1$ ), this implies that the meta-algorithm's regret satisfies

$$\mathbb{E} \left[ \sum_{t=1}^n f_t(w_t^{i_t}) - \min_{i \in [N]} \left\{ \inf_{w \in \mathcal{W}_i} \sum_{t=1}^n f_t(w) + O(R_i L \sqrt{n/\lambda}) + O(R_i L \sqrt{n \log(R_i L n / \pi_i)}) \right\} \right] \leq 0.$$

Which, using that  $\pi_i = 1/(n+1)$  and combining terms, further implies

$$\mathbb{E} \left[ \sum_{t=1}^n f_t(w_t^{i_t}) - \min_{i \in [N]} \left\{ \inf_{w \in \mathcal{W}_i} \sum_{t=1}^n f_t(w) + O(R_i L \sqrt{n \log(R_i L n / \lambda)}) \right\} \right] \leq 0.$$

Now, recall that  $i \in [n+1]$ , and that  $R_i = e^{i-1}$ . Consider the algorithm's regret against a comparator  $w$ . For now, assume that  $w$  satisfies  $1 \leq \|w\| \leq e^n$  — we will see shortly that this is without loss of generality. Let  $i^*(w) = \min\{i \mid w \in \mathcal{W}_i\}$ . Then the regret bound above implies

$$\mathbb{E} \left[ \sum_{t=1}^n f_t(w_t^{i_t}) - \left\{ \sum_{t=1}^n f_t(w) + O(R_{i^*(w)} L \sqrt{n \log(R_{i^*(w)} L n / \lambda)}) \right\} \right] \leq 0.$$

Furthermore, since  $R_i = e^{i-1}$ , we have that  $R_{i^*(w)} \leq e\|w\|$ , and so

$$\mathbb{E} \left[ \sum_{t=1}^n f_t(w_t^{i_t}) - \left\{ \sum_{t=1}^n f_t(w) + O(\|w\| L \sqrt{n \log(\|w\| L n / \lambda)}) \right\} \right] \leq 0.$$

This is exactly the regret bound we wanted. Now, the case where  $\|w\| \leq 1$  is handled by simply noting  $i^*(w) = 1$  and writing  $R_1 = 1 \leq 1 + \|w\|$ , which gives the  $\|w\| + 1$  factor as follows:

$$\mathbb{E} \left[ \sum_{t=1}^n f_t(w_t^{i_t}) - \left\{ \sum_{t=1}^n f_t(w) + O((\|w\| + 1) L \sqrt{n \log((\|w\| + 1) L n / \lambda)}) \right\} \right] \leq 0.$$

To handle the case where  $\|w\| \geq e^n$  we appeal to Corollary 1 with  $c = L\sqrt{n}$  and  $\gamma = 1/2$ , which shows that it suffices to consider only  $\|w\| \leq \exp\left(\left(\frac{Ln}{c}\right)^{1/\gamma}\right) = e^n$ . Note that the constants appearing in the regret bound above, both inside the  $O(\cdot)$  and inside the  $\sqrt{\log(\cdot)}$  are worse than those with which we instantiate Corollary 1. This is not an issue because worse constants only reduce the radius that must be considered in the corollary.  $\square$

**Lemma 3.** Let  $F : \mathbb{R}_+ \rightarrow \mathbb{R}_+$  be given. Suppose the loss sequence  $(f_t)_{t \leq n}$  is  $L$ -Lipschitz with respect to  $\|\cdot\|_*$ . Then a regret bound of the form

$$\sum_{t=1}^n f_t(w_t) - \sum_{t=1}^n f_t(w) \leq F(\|w\|) \quad \forall w \in \mathfrak{B} \quad (15)$$

holds if the restricted regret bound

$$\sum_{t=1}^n f_t(w_t) - \sum_{t=1}^n f_t(w) \leq F(\|w\|) \quad \forall f : \|f\| \leq \alpha^*, \quad (16)$$

holds, where  $\alpha^*$  is the greatest non-negative number for which  $F(\alpha^*) - \alpha^* Ln \geq F(0)$ .

**Proof of Lemma 3.** Assume wlog that  $f_t(0) = 0$  for each  $t$ . This is possible because

$$\sum_{t=1}^n f_t(w_t) - \sum_{t=1}^n f_t(w) = \sum_{t=1}^n (f_t(w_t) - f_t(0)) - \sum_{t=1}^n (f_t(w) - f_t(0)).$$

To begin, observe that (15) is equivalent to

$$\sum_{t=1}^n f_t(w_t) \leq \inf_{w \in \mathfrak{B}} \left\{ \sum_{t=1}^n f_t(w) + F(\|w\|) \right\}.$$

By selecting  $w = 0$ ,  $f_t(0) = 0$  implies that the infimum on the right is always upper bounded in value by  $F(0)$ . In the other direction, Lipschitzness of the losses along with  $f_t(0) = 0$  implies that the infimum is lower bounded as

$$\inf_{w \in \mathfrak{B}} \left\{ \sum_{t=1}^n f_t(w) + F(\|w\|) \right\} \geq \inf_{w \in \mathfrak{B}} \{-L\|w\|n + F(\|w\|)\} = \inf_{\alpha \geq 0} \{-\alpha Ln + F(\alpha)\}.$$

Therefore if  $\alpha \geq \alpha^*$ , the lower bound  $-\alpha Ln + F(\alpha)$  will be sub-optimal compared to the upper bound of  $F(0)$  obtained by choosing  $\alpha = 0$ .  $\square$

**Corollary 1.** When  $F(r) = c \cdot (r + 1) \log(r + 1)^\gamma$  for  $\gamma > 0$ , it is sufficient to consider

$$\sum_{t=1}^n f_t(w_t) - \sum_{t=1}^n f_t(w) \leq F(\|w\|) \quad \forall w : \|w\| \leq \exp\left(\left(\frac{Ln}{c}\right)^{1/\gamma}\right). \quad (17)$$

**Proof of Corollary 1.** Note that  $F(0) = 0$ . Let  $r$  denote the minimizer of  $F(\alpha) - \alpha \cdot a$  (where  $a = Ln$ ). Differentiating this expression yields

$$a = c(\log(r + 1)^\gamma + \gamma \log(r + 1)^{\gamma-1}),$$

which further implies

$$\log(r + 1)^\gamma = \frac{a}{c} \cdot \frac{1}{1 + \gamma / \log(r + 1)} \leq \frac{a}{c}.$$

Rearranging, we have  $r \leq \exp((a/c)^{1/\gamma}) - 1$ . Since  $F(\alpha) - \alpha \cdot a$  is strictly convex, this function is increasing above  $r$ . To conclude, we guess an upper bound on the value of  $\alpha^*$ :  $\alpha := \exp((a/c)^{1/\gamma}) - 1$ . Substituting this value in, we have

$$F(\alpha) - \alpha \cdot a \geq a \exp((a/c)^{1/\gamma}) - a \cdot \exp((a/c)^{1/\gamma}) = 0 = F(0),$$

which yields the result.  $\square$

**Proof of Theorem 4.** We only sketch the details of this proof as it follows Theorem 3 very closely.

We first describe sub-algorithm configuration for MULTISCALEOCO that achieves the claimed regret bound. Our strategy will be to take a discretization the range of  $p$  values  $[1 + \delta, 2]$ , and produce a set of sub-algorithms for each  $p$  in this discrete set. For a fixed  $p$ , the construction of the set of sub-algorithms will be exactly is in Theorem 3. The discrete set of  $p$ s will have the form  $p_k = 1 + \delta + \min\{(k - 1) \cdot \epsilon, (1 - \delta)\}$ , for  $\epsilon = 1/\log(d)$  and  $k \in [1, \dots, K]$ , where  $K = \lceil (1 - \delta)/\epsilon \rceil + 1$  (in particular  $k \leq \log(d) + 1$ ).

For a fixed  $k$ , the norm  $\|\cdot\|_{p_k}$  has that  $\frac{1}{2}\|\cdot\|_{p_k}^2$  is  $(p_k - 1)$ -strongly convex with respect to itself [19]. With this in mind, we create a set of  $N := K(n + 1)$  sub-algorithms, which we will index by pairs  $(k, j) \in [K] \times [n + 1]$  instead of  $i \in [K(n + 1)]$  for notational convenience.



- For each  $k \in [K]$ :
  - $L_k = L_{p_k}$ .
  - For each  $j \in \{1, \dots, n+1\}$ :
    - \* Set  $R_j = e^{j-1}$ .
    - \* Take  $\mathcal{W}_{(k,j)} = \{w \in \mathfrak{B} \mid \|w\|_{p_k} \leq R_j\}$ ,  $\eta_{(k,j)} = \frac{R_j}{L_k} \sqrt{\frac{\lambda_{p_k}}{n}}$ , where  $\lambda_{p_k} = (p_k - 1)$ .
    - \* Let  $\text{ALG}_j = \text{MIRRORDESCENT}(\eta_{(k,j)}, \mathcal{W}_{(k,j)}, \|\cdot\|_{p_k}^2)$ .
- $\pi = \text{Uniform}([K] \times [n+1])$ .

Clearly the total number of sub-algorithms and hence the running time scales as  $O(n \cdot \log(d))$ .

Referring back to the proof of [Theorem 3](#), and letting  $(k_t, j_t)$  denote the index pair chosen by MULTISCALEOCO in round  $t$ , it is clear that for a fixed  $k$ , the algorithm satisfies for all  $w \in \mathbb{R}^d$

$$\mathbb{E} \left[ \sum_{t=1}^n f_t(w_t^{(k_t, j_t)}) - \left\{ \sum_{t=1}^n f_t(w) + O\left((\|w\|_{p_k} + 1)L_{p_k} \sqrt{n \log((\|w\|_{p_k} + 1)L_{p_k} n \log(d))/(p_k - 1)}\right) \right\} \right] \leq 0.$$

In fact, the regret guarantee for MULTISCALEOCO implies that

$$\mathbb{E} \left[ \sum_{t=1}^n f_t(w_t^{(k_t, j_t)}) - \min_{k \in [N]} \left\{ \sum_{t=1}^n f_t(w) + O\left((\|w\|_{p_k} + 1)L_{p_k} \sqrt{n \log((\|w\|_{p_k} + 1)L_{p_k} n \log(d))/(p_k - 1)}\right) \right\} \right] \leq 0. \quad (18)$$

We now appeal to the choice of discretization to deduce that

$$\mathbb{E} \left[ \sum_{t=1}^n f_t(w_t^{(k_t, j_t)}) - \min_{p \in [1+\delta, 2]} \left\{ \sum_{t=1}^n f_t(w) + O\left((\|w\|_p + 1)L_p \sqrt{n \log((\|w\|_p + 1)L_p \log(d)n)/(p-1)}\right) \right\} \right] \leq 0.$$

Suppose there is some  $p \in [1+\delta, 2]$  of interest. Let  $k$  be the greatest integer for which  $p_k \leq p$ . We claim that the bound

$$\mathbb{E} \left[ \sum_{t=1}^n f_t(w_t^{(k_t, j_t)}) - \left\{ \sum_{t=1}^n f_t(w) + O\left((\|w\|_{p_k} + 1)L_{p_k} \sqrt{n \log((\|w\|_{p_k} + 1)L_{p_k} n \log(d))/(p_k - 1)}\right) \right\} \right] \leq 0,$$

implies the desired result. By duality we have that  $\|w\|_{p_k} \geq \|w\|_p$  and  $L_{p_k} \leq L_p$ . To conclude, observe that  $\|w\|_{p_k}/\|w\|_p \leq \|w\|_{p_k}/\|w\|_{p_{k+1}} \leq d^\epsilon = d^{1/\log(d)} = O(1)$ , so the norm terms in the bound above are within constant factors of the desired bound.  $\square$

**Proof of [Theorem 5](#).** Recall that for fixed  $k$ , the learner predicts from a class

$$\mathcal{W}_k = \{W \in \mathbb{R}^{d \times d} \mid W \geq 0, \|W\|_\sigma \leq 1, \langle W, I \rangle = k\},$$

and experiences affine losses  $f_t(W_t) = \langle I - W_t, Y_t \rangle$ , where  $Y_t \in \mathcal{Y} := \{Y \in \mathbb{R}^{d \times d} \mid Y \geq 0, \|Y\|_\sigma \leq 1\}$ . The regret for this game is given by

$$\sup_{W \in \mathcal{W}_k} \left[ \sum_{t=1}^n \langle I - W_t, Y_t \rangle - \sum_{t=1}^n \langle I - W, Y_t \rangle \right]. \quad (19)$$

From [\[29\]](#), we have that for fixed  $k$  the strategy MATRIX EXPONENTIATED GRADIENT has regret bounded by

$$O\left(\min\left\{\sqrt{nk^2 \log(n/k)}, \sqrt{n(d-k)^2 \log(n/(d-k))}\right\}\right) = \tilde{O}\left(\sqrt{n \min\{k, d-k\}^2}\right).$$

Note: The variant of MATRIX EXPONENTIATED GRADIENT that obtains this strategy uses either losses or gains depending on the value of  $k$ . See [\[29\]](#) for more details.

The configuration with which we invoke MULTISCALEOCO is:

- For each  $i \in [\lceil \log(d/2) \rceil + 1]$ :
  - Set  $R_i = e^{i-1}$ ,  $L_i = 1$ .

- $\mathcal{W}_i = \{W \in \mathbb{R}^{d \times d} \mid W \geq 0, \|W\|_\sigma \leq 1, \langle W, I \rangle = R_i\}$
- Take  $\text{ALG}_i = \text{MATRIX EXPONENTIATED GRADIENT}(\mathcal{W}_i)$  as described in [29].
- $\pi = \text{Uniform}([\log(d/2)] + 1)$ .

As in [Theorem 3](#) and [Theorem 4](#), choosing  $R_i$  to be spaced exponentially is sufficient to guarantee that there is a sub-algorithm whose regret is within a constant factor  $e$  of  $\tilde{O}(k\sqrt{n})$  for any choice of the rank  $k$ .

All that remains is that the losses of the sub-algorithms satisfy the claimed upper bound  $R_i$ . Observe that  $\text{MULTISCALEOCO}$  works with centered loss  $\tilde{f}_t(W) = -\langle W, Y_t \rangle$ . For any  $W \in \mathcal{W}_k$ , we have

$$|\langle W, Y_t \rangle| \leq \|Y_t\|_\sigma \|W\|_\Sigma \leq 1 \cdot R_k,$$

so the condition is satisfied.  $\square$

**Proof of [Theorem 6](#).** We will use a meta-algorithm strategy closely resembling that of the smooth Banach space setting. The only difference is that  $\|\cdot\|_\Sigma$  is not smooth, so  $\text{MATRIX MULTIPLICATIVE WEIGHTS}$ , which uses the log-trace-exponential function as a surrogate for  $\|\cdot\|_\Sigma$ , is used as the sub-algorithm instead of working with  $\|\cdot\|_\Sigma$  directly.

We use the version of  $\text{MATRIX MULTIPLICATIVE WEIGHTS}$  stated in [18] Theorem 13, which uses classes of the form  $\mathcal{W}_r = \{W \in \mathbb{R}^{d \times d} \mid W \geq 0, \|W\|_\Sigma \leq r\}$  and has regret against  $\mathcal{W}_r$  bounded by  $O(r\sqrt{n \log d})$  whenever each loss matrix  $Y_t$  has  $\|Y_t\|_\sigma \leq 1$ . Using this strategy for fixed  $r$  as a sub-algorithm for  $\text{MULTISCALEOCO}$ , we achieve the following oracle inequality efficiently:

For each  $i \in [n+1]$ :

- Set  $R_i = 2^{i-1}$
- $L_i = 1$  (we are assuming  $\|Y_t\|_\sigma \leq 1$ ).
- $\mathcal{W}_i = \{W \in \mathbb{R}^{d \times d} \mid W \geq 0, \|W\|_\Sigma \leq R_i\}$
- $\text{ALG}_i = \text{MATRIX MULTIPLICATIVE WEIGHTS}(\mathcal{W}_i)$

Finally, we set  $\pi = \text{Uniform}([n+1])$ . That this configuration is sufficient follows from the doubling analysis given in the proof of [Theorem 3](#). Losses are once again bounded via  $|\langle W, Y_t \rangle| \leq \|W\|_\Sigma \|Y_t\|_\sigma \leq R_i$  for  $W \in \mathcal{W}_i$ .  $\square$

### A.3 Proofs from [Section 2.3](#)

---

#### Algorithm 5

---

```

procedure MULTISCALELEARNING( $\{\text{ALG}_i, R_i, L_i\}_{i \in [N]}, \pi$ )    ▷ Collection of sub-algorithms, prior  $\pi$ .
   $c \leftarrow (R_i \cdot L_i)_{i \in [N]}$                                 ▷ Sub-algorithm scale parameters.
  Define  $\tilde{\ell}(\hat{y}, y) = \ell(\hat{y}, y) - \ell(0, y)$ .                    ▷ Center the loss function.
  for  $t = 1, \dots, n$  do
    Receive context  $x_t$ 
     $\hat{y}_t^i \leftarrow \text{ALG}_i((x_1, y_1), \dots, (x_{t-1}, y_{t-1}), x_t)$  for each  $i \in [N]$ .
     $i_t \leftarrow \text{MULTISCALEFTPL}[c, \pi](g_1, \dots, g_{t-1})$ .
    Play  $\hat{y}_t = \hat{y}_t^{i_t}$ .
    Observe  $y_t$  and let  $g_t = (\tilde{\ell}_t(\hat{y}_t^i, y_t))_{i \in [N]}$ .
  end for
end procedure

```

---

**Proof of [Theorem 7](#).** This theorem is an immediate consequence of [Theorem 2](#), using the absolute value  $|\cdot|$  as the norm. The only significant detail one must check is that the proof of [Theorem 2](#) uses the regret statement for each sub-algorithm as a black box, and so the nonlinearity of the comparator  $\mathcal{F}$  does not change the analysis.  $\square$

**Proof of Theorem 8.** This is a corollary of Theorem 7. That theorem, configured with one sub-algorithm for each class  $\mathcal{F}_k$  and with  $L_k = L$ ,  $R_k = R_k$ , and  $\pi_k = 1/k^2$ , implies

$$\mathbb{E} \left[ \sum_{t=1}^n \ell(\hat{y}_t^i, y_t) - \inf_{f \in \mathcal{F}_k} \sum_{t=1}^n \ell(f(x_t), y_t) \right] \leq \mathbb{E}[\mathbf{Rad}_n(\mathcal{F}_k)] + O\left(R_k L \sqrt{n \log(R_k L n k)}\right) \quad \forall i \in [N]. \quad (20)$$

The final regret bounded stated follows from the assumed growth rate on  $\mathbf{Rad}(\mathcal{F}_k)$ .  $\square$

**Proof of Theorem 9.** We briefly sketch the construction as follows:

1. For each  $\mathcal{H}_k$ , construct a sequence of nested subclasses (norm balls) as precisely as in the proof of Theorem 3. There will be  $O(n)$  sub-algorithms for each such class.
2. For each sub-algorithm in class  $k$ , take the prior weight  $\pi$  proportional to  $1/nk^2$ .

Using the analysis from Theorem 3 — namely that for each norm  $\|\cdot\|_{\mathcal{H}_k}$  it is sufficient to only consider predictors with norm bounded by  $e^n$  —, one can see that the result follows from Theorem 7.  $\square$
